# Supplementary material for: CT-Based Radiomics to Predict KRAS Mutation in CRC Patients Using a Machine Learning Algorithm: A Retrospective Study
Source: MDPI journal article supplement (doi:10.3390/biomedicines11082144), 2023-07-29
Supplement: s1 [file s1]

# Supplementary Materials

**Table S1.** Minimum, median, mean and maximum kappa achieved by each classifier over all the datasets. In bold the best value for each column.

| Classifier   | Kappa (%)    |             |             |             |
|--------------|--------------|-------------|-------------|-------------|
|              | Minimum      | Median      | Mean        | Maximum     |
| svm(O)       | -29.9        | 10.7        | 7.4         | 38.5        |
| elm(O)       | -47.4        | 0.0         | -0.4        | 45.5        |
| lda(O)       | -33.2        | 19.6        | <b>14.0</b> | 42.6        |
| lda(M)       | -30.6        | 17.5        | 10.2        | 38.8        |
| dlda(M)      | -42.9        | 2.6         | 1.0         | 32.0        |
| mlp(M)       | -43.6        | 4.3         | 3.4         | 42.0        |
| ctree(M)     | <b>-25.3</b> | 3.3         | 3.1         | 33.0        |
| ridge(M)     | -48.1        | 0.0         | 0.3         | 44.9        |
| knn(M)       | -34.3        | 8.3         | 5.1         | 28.2        |
| lasso(M)     | -61.3        | 9.9         | 3.2         | 38.8        |
| qda(M)       | -27.3        | 0.7         | 1.3         | 28.2        |
| nb(M)        | -30.0        | 4.8         | 6.7         | 36.4        |
| adaboost(M)  | -40.4        | 6.7         | 5.1         | 28.2        |
| logreg(M)    | -29.9        | 9.8         | 8.9         | 42.3        |
| lda(P)       | -30.6        | 14.1        | 9.5         | 35.4        |
| logreg(P)    | -30.6        | 9.1         | 7.6         | 35.4        |
| kfd(P)       | -40.0        | 9.3         | 7.6         | 35.4        |
| rf(P)        | -28.6        | 9.7         | 7.7         | 38.5        |
| svm(P)       | -31.2        | 10.8        | 7.6         | 38.5        |
| adaboost(P)  | -37.8        | 13.6        | 10.0        | <b>53.7</b> |
| mlp(P)       | -56.4        | 5.5         | 3.4         | 52.7        |
| sgd(P)       | -36.4        | 9.6         | 6.3         | 42.6        |
| ctree(P)     | -29.2        | 7.1         | 7.4         | 35.7        |
| gbm(P)       | -30.6        | 9.6         | 9.6         | 38.5        |
| avNNet(R)    | -44.6        | 5.9         | 3.4         | 42.0        |
| bagging(R)   | -33.9        | 9.8         | 5.2         | 24.0        |
| ctree(R)     | -26.6        | <b>27.6</b> | 13.1        | 34.4        |
| knn(R)       | -30.6        | 6.2         | 7.9         | 42.0        |
| lda(R)       | -30.6        | 14.1        | 9.5         | 35.4        |
| nb(R)        | -30.6        | 2.8         | 5.0         | 38.2        |
| neuralnet(R) | -29.9        | 10.3        | 9.1         | 46.6        |
| nnet(R)      | -33.2        | 7.1         | 6.1         | 42.9        |
| rpart(R)     | -37.1        | 4.3         | 2.8         | 46.0        |
| svm(R)       | -44.1        | 12.0        | 8.6         | 39.1        |

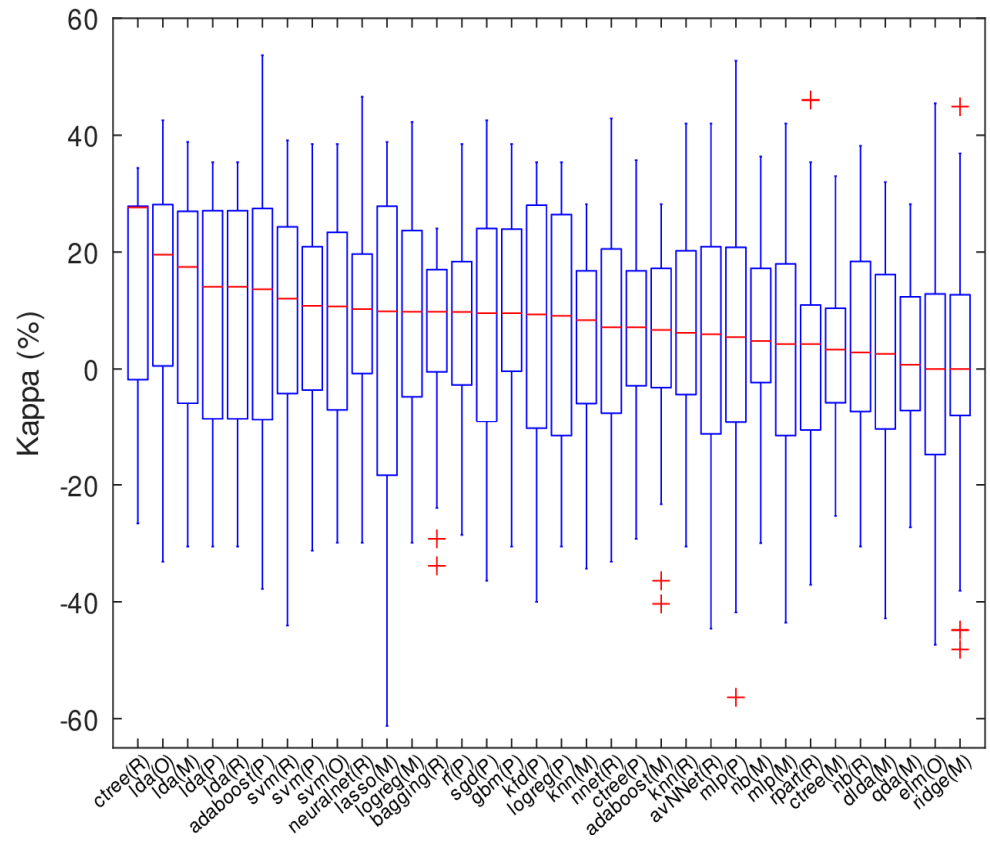

**Figure S1.** Boxplot of the kappa values achieved by each classifier over all the datasets. The boxes are sorted by decreasing median value (red line inside the box).
